## P756

**Paradoxical restricted motion in diastole associated to mitral valve prolapse/dystrophy: a frequent finding**

Le Tourneau T.; Cueff C.; Marrec M.; Piriou N.; Capoulade R.; Le Scouarnec S.; Merot J.; Schott JJ.

Institut du Thorax, Inserm UMR 1087, Nantes, France

**Funding Acknowledgements:** PHRCI mitral 2012

**Background:** Filamin-A mitral valve prolapse/dystrophy (FLNA-MVP) phenotype associates moderate MVP and a paradoxical restricted motion in diastole.

**Purpose:** We aimed to assess the association of MVP with restricted motion in diastole in MVP patients (restricted MVP).

**Methods:** We prospectively enrolled 433 MVP probands ( $57 \pm 16$  years). Patients underwent a clinical examination and a comprehensive echocardiographic analysis of mitral valve apparatus.

**Results** Among the 433 probands, 27 (6.2%, 95% CI 3.9-8.5) had both a MVP and a doming aspect in diastole. Patients with restricted MVP exhibited shorter posterior chordae tendinae ( $24.8 \pm 6.3$  vs  $27.2 \pm 5.9$  mm,  $P = 0.037$ ), and a shorter distance between papillary muscle (PM) tips and mitral annulus (anterior PM:  $P = 0.0001$ ; posterior PM:  $P = 0.009$ ). Anterior mitral valve leaflet was lengthened ( $15.5 \pm 2.4$  vs  $14.3 \pm 2.6$  mm/m<sup>2</sup>,  $P = 0.018$ ), but leaflet thickness, leaflet prolapse, and mitral valve annulus did not differ between the 2 groups. Bicuspid aortic valve was more frequent in patients with restricted phenotype (14.8 vs 2.9%,  $P < 0.05$ ). Familial recurrence of restricted MVP was identified even in the absence of Filamin-A mutation.

**Conclusion:** Restricted MVP is a quite frequent finding in MVP patients and is associated with PM tips location closer to mitral annulus. Restricted MVP can be regarded as a third type of MVP beside myxomatous Barlow disease and fibro-elastic deficiency MVP.
